# Supplementary material
Source: MDPI journal article supplement (https://www.mdpi.com/2071-1050/14/17/10734)
Supplement: s1 [file s1 › Table S1.pdf]

Table S1. Operationalization of service quality (SQ) and consumer satisfaction (CS) in sharing economy accommodation quantitative research.

| Paper (reference, first author, year) | Aim                                                                                                                                                                                            | Research area / no. of questionnaires | Predictors of SQ                                                                           | Constructs representing SQ                                            | SQ output                                            | Predictors of CS                                                                                                | CS output                          |
|---------------------------------------|------------------------------------------------------------------------------------------------------------------------------------------------------------------------------------------------|---------------------------------------|--------------------------------------------------------------------------------------------|-----------------------------------------------------------------------|------------------------------------------------------|-----------------------------------------------------------------------------------------------------------------|------------------------------------|
| [14]<br>Huang 2019                    | To explore consumer behaviour for the sharing economy in the hotel industry                                                                                                                    | Taiwan / 450                          | -                                                                                          | 1. network platform's service quality<br>2. lodging service quality   | CS                                                   | 1. network platform's service quality<br>2. lodging service quality<br>3. experience                            | Continuous consumption behaviour   |
| [38]<br>Kreeger 2021                  | Evaluates Airbnb guest preferences for seven established accommodation characteristics: Price; Financial Information Security; Personal Safety; Location, Empathy, Amenities, and Cleanliness. | MTurk (USA)/614                       | -                                                                                          | Cleanliness<br>Empathy<br>Financial Information<br>Security<br>Safety | CS                                                   | Price/Value<br>Financial Info<br>Security<br>Personal Safety<br>Location<br>Empathy<br>Amenities<br>Cleanliness | Word of Mouth<br>Return Intentions |
| [9]<br>Lalicic 2018                   | To investigate Airbnb as a service setting                                                                                                                                                     | International students?/557           | -                                                                                          | 1 construct only (service quality)                                    | Loyalty                                              | -                                                                                                               | -                                  |
| [15]<br>Möhlmann 2015                 | To determine a framework on the determinants of choosing a sharing option.                                                                                                                     | Germany/187                           | -                                                                                          | 1 construct only (service quality)                                    | Satisfaction (ns)<br>Likelihood of repeated use (ns) | Cost savings<br>Familiarity<br>Trust<br>Utility                                                                 | Likelihood of repeated use         |
| [13]<br>Priporas 2017                 | To investigate service quality, customer satisfaction, and loyalty in Airbnb accommodation                                                                                                     | Phuket, Thailand / 202                | Assurance<br>Tangibles<br>Convenience<br>Understanding & caring<br>Adequacy service supply | -                                                                     | CS<br>Loyalty                                        | SQ                                                                                                              | Loyalty                            |

|                       |                                                                                                                                                                                                                                    |                        |                                                                                            |                     |    |                                                                            |                       |
|-----------------------|------------------------------------------------------------------------------------------------------------------------------------------------------------------------------------------------------------------------------------|------------------------|--------------------------------------------------------------------------------------------|---------------------|----|----------------------------------------------------------------------------|-----------------------|
| [34]<br>Priporas 2017 | To investigate customers' perceptions of the service quality facets of Airbnb accommodation                                                                                                                                        | Phuket, Thailand / 265 | Tangibles<br>Convenience<br>Assurance<br>Understanding & caring<br>Adequacy service supply | -                   | -  |                                                                            |                       |
| [37]<br>Chen 2018     | To understand the factors affecting the purchase intention on Airbnb                                                                                                                                                               | ./280                  | -                                                                                          | Information quality | CS | Information quality<br>Media richness                                      | Purchase intention    |
| [39]<br>Sthapit 2019  | To examine the relationships among the dimensions of consumption values (functional, social and emotional), co-creation, information overload, satisfaction and continuance intention derived from the use of the Airbnb platform. | Italy/259              | -                                                                                          | -                   | -  | Functional Value<br>Emotional Value<br>Co-creation<br>Information Overload | Continuance Intention |
| [40]<br>Birinci 2018  | To compare customer perceptions of hotel and peer-to-peer (e.g., Airbnb) accommodation advantages and disadvantages and examine their influence on customer satisfaction and repurchase intentions.                                | USA (MTurk)/ 391       | -                                                                                          | -                   | -  | Product Performance<br>Risk<br>Safety and Security Risk                    | Repurchase Intentions |
